# Supplementary material for: IL-2 induces a WAVE2-dependent pathway for actin reorganization that enables WASp-independent human NK cell function
Source: JCI journal article supplement (doi:10.1172/jci44862), 2011-03-07
Supplement: sd1 [file 1]

Supplemental Figures and Legends

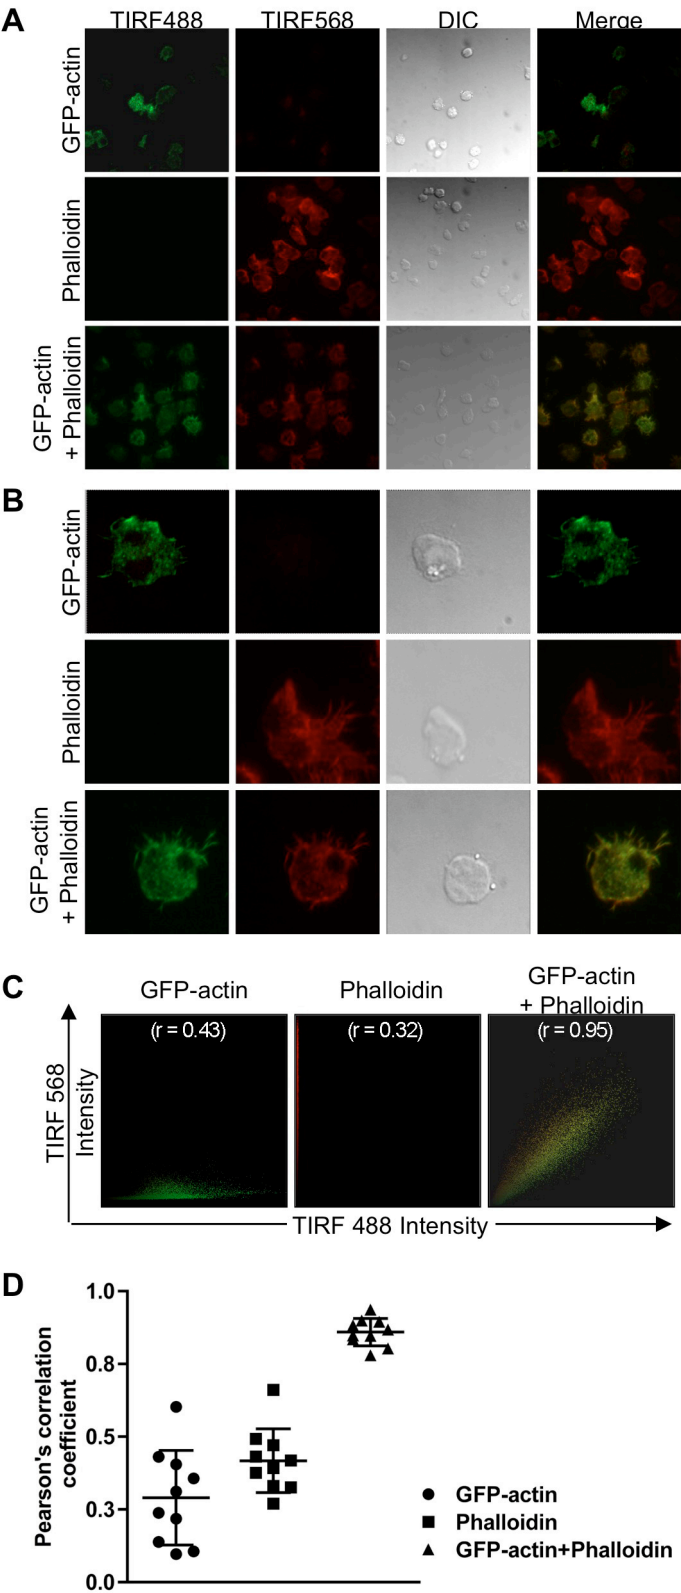

**Supplemental Figure 1. Representation of F-actin by GFP-actin.** Parental or GFP-actin transduced NK92 cells were incubated on anti-CD18- and anti-NKp30-coated coverslips for 25 minutes then fixed, permeabilized, and stained where indicated with AlexaFluor 568-conjugated phalloidin. Cells were visualized using total internal reflection fluorescence (TIRF) and differential interference contrast (DIC) microscopy (original magnification 60 $\times$ ). A field (**A**) or single cell magnification (**B**) are shown. AlexaFluor568-conjugated streptavidin was used as a negative control for phalloidin (top row), and parental (non-GFP-containing) NK92 cells were used as a negative control for GFP-actin (middle row). Both GFP-actin and AlexaFluor 568-conjugated phalloidin were present in the images shown in the third row. An overlay of 488 and 568 TIRF fluorescence is provided in the right column. (**C**) Individual cells from (A) were selected and individual pixels evaluated for colocalization of green and red fluorescence using Volocity software. Representative analyses are shown for NK92 GFP-actin/SA-568 (left), NK92/568 phalloidin (middle) and NK92 GFP-actin/568 phalloidin (right). Pearson's correlation coefficient ( $r$ ) was obtained for each analysis and is shown above each image. (**D**) Pearson's correlation coefficient was determined for individual cells from each condition ( $n = 10$ ) and mean  $\pm$ SD of  $r$ -values plotted.

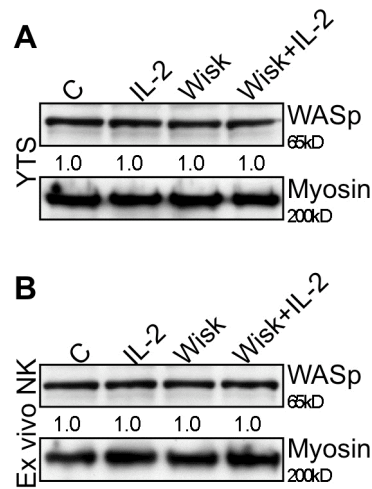

**Supplemental Figure 2.** Effect of IL-2 upon cellular WASP content. YTS (**A**) and ex vivo NK (**B**) cells were pretreated with vehicle (c - control), or Wiskostatin (Wisk) for 30min, followed by media or IL-2 for 30min prior to lysis. Whole cell lysates were evaluated for WASp content by Western blot analysis (top). Membranes were stripped and reprobbed with for myosin-IIA as a loading control (bottom). Numbers beneath each lane represent densitometric ratios of WASp normalized to myosin-IIA.

## Control

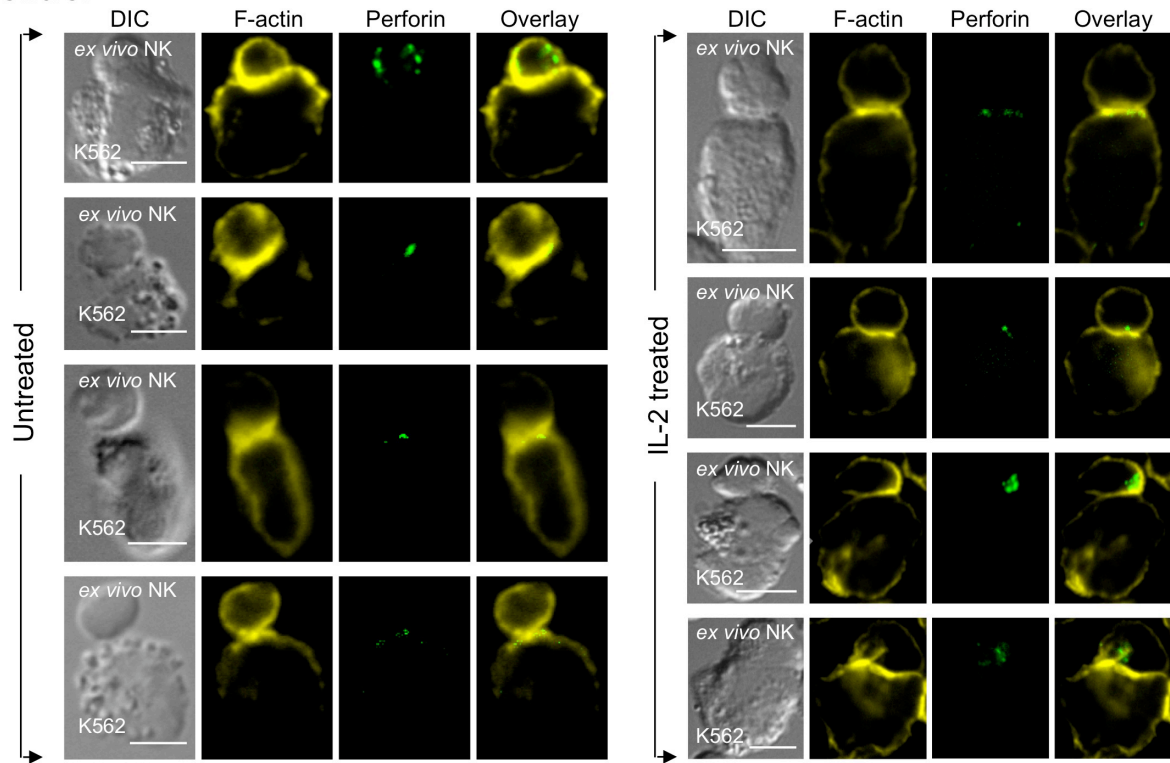

## WASP<sup>del</sup>

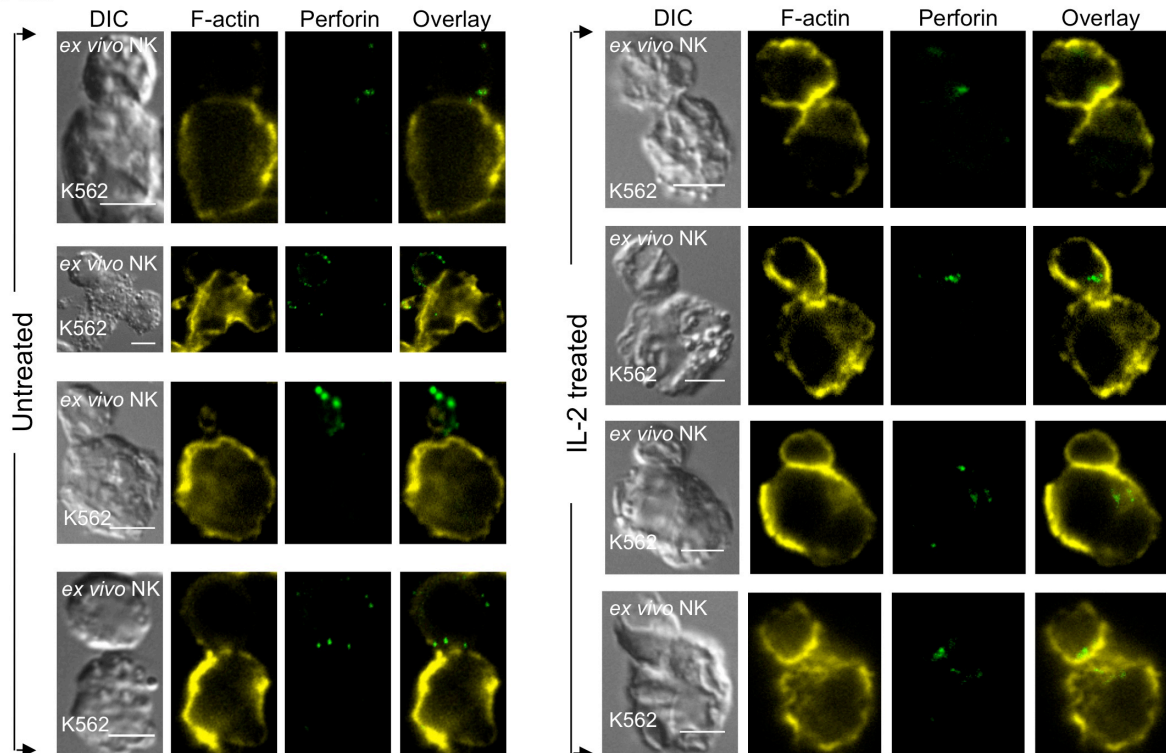

**Supplemental Figure 3.** F-actin at the NK cell IS in WASP-deleted patient NK cells and the effect of *in vitro* IL-2. Additional representative examples to those in Figure 2 of the

NK cell IS formed with K562 target cells in resting ex vivo NK cells from either a control donor (Control) or from a WAS patient having a complete deletion of the *WASP* gene (*WASP<sup>del</sup>*) (left panels). The NK cell IS formed with K562 target cells was also evaluated in control or patient cells that had been stimulated in vitro for 30min with IL-2. Five separate examples of each are shown. Images show DIC (left most column) and confocal fluorescence microscopy for F-actin using phalloidin (yellow) and perforin (green) as well as an overlay of fluorescent channels (right most column). Scale bar=5 $\mu$ m.

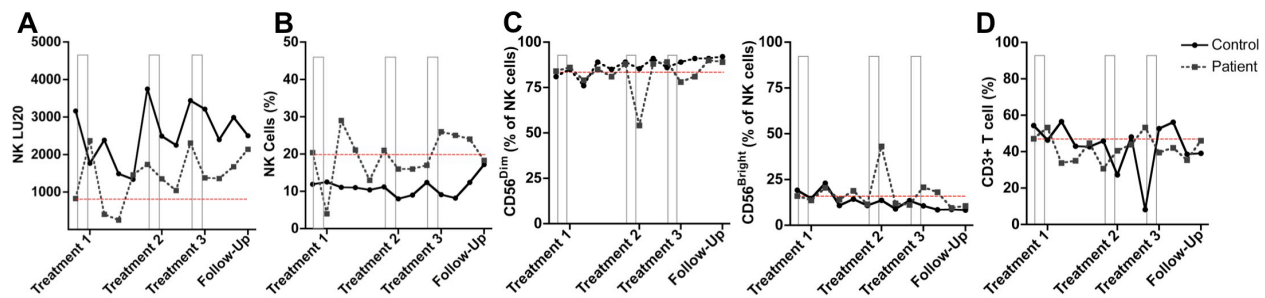

**Supplemental Figure 4. Longitudinal NK cell function and percentage in a WAS patient during in vivo IL-2 treatment.** (A) NK cell cytotoxicity amongst PBMC was measured throughout the treatment course and was expressed as LU<sub>20</sub> per NK cell present in the PBMC. The WAS patient values (dashed line) were compared to that in an individual healthy donor (not treated with IL-2 - solid line) throughout the study. The dashed red line denotes the patient's pre-treatment value and the open rectangles correspond to the 5d periods of IL-2 administration. These notations are held consistent throughout (B-D). (B) The percentage of total NK cells as defined by CD3<sup>+</sup>/CD56<sup>+</sup> lymphocytes among PBMC as well the percentage of these that were (C) CD56<sup>Dim</sup> and (D) CD56<sup>Bright</sup>. (E) The percentage of total T cells as defined by CD3<sup>+</sup>/CD56<sup>-</sup> lymphocytes amongst PBMC in samples obtained throughout the protocol.

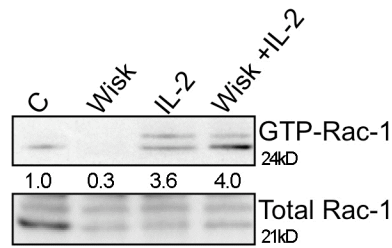

**Supplemental Figure 5.** *IL-2-induced Rac activation in NK cells.* YTS cells were pretreated with vehicle (c - control), or Wiskostatin (Wisk) for 30min, followed by media or IL-2 for 30min prior to lysis. Whole cell lysates were evaluated for total Rac-1 content by Western blot analysis (bottom). A portion of the lysate was used for immunoprecipitation of activated Rac using PAK-1 p21 binding domain GST fusion protein agarose beads. Precipitate was evaluated for the presence of Rac-1 by Western blot analysis (top). Numbers beneath each lane represent the activated densitometric ratio of the activated Rac-1 to that present in the control lane. Both bands shown in each lane were used for densitometric evaluation and take into account the relative tapering of the right-most lane in the top blot.
